# Supplementary material
Source: PubMed Central journal article supplement (PMC6686971)
Supplement: jamainternmed-179-1406-s002.pdf [file jamainternmed-179-1406-s002.pdf]

## **Data Sharing Statement**

Dyrbye. Effect of a Professional Coaching Intervention on the Well-being and Distress of Physicians. *JAMA Intern Med.* Published August 05, 2019. 10.1001/jamainternmed.2019.2425

### **Data**

**Data available:** No
